# Supplementary material for: Restored nitric oxide bioavailability reduces the severity of acute-to-chronic transition in a mouse model of aristolochic acid nephropathy
Source: PubMed Central journal article supplement (PMC5568239; doi:10.1371/journal.pone.0183604), 2017-08-23
Supplement: pone.0183604.s003.pdf [file pone.0183604.s003.pdf]

**S3 Fig. Effect of L-arginine supplementation on relative kidney expression of NADPH oxidase 2 (NOX2), NADPH oxidase 4 (NOX4), nuclear factor erythroid 2-related factor 2 (NRF2) and heme-oxygenase 1 (HO-1) mRNA ( $2^{-\Delta\Delta CT}$ ) at days 5, 10 and 20 in CTL, AA and AA+L-Arg mice.**

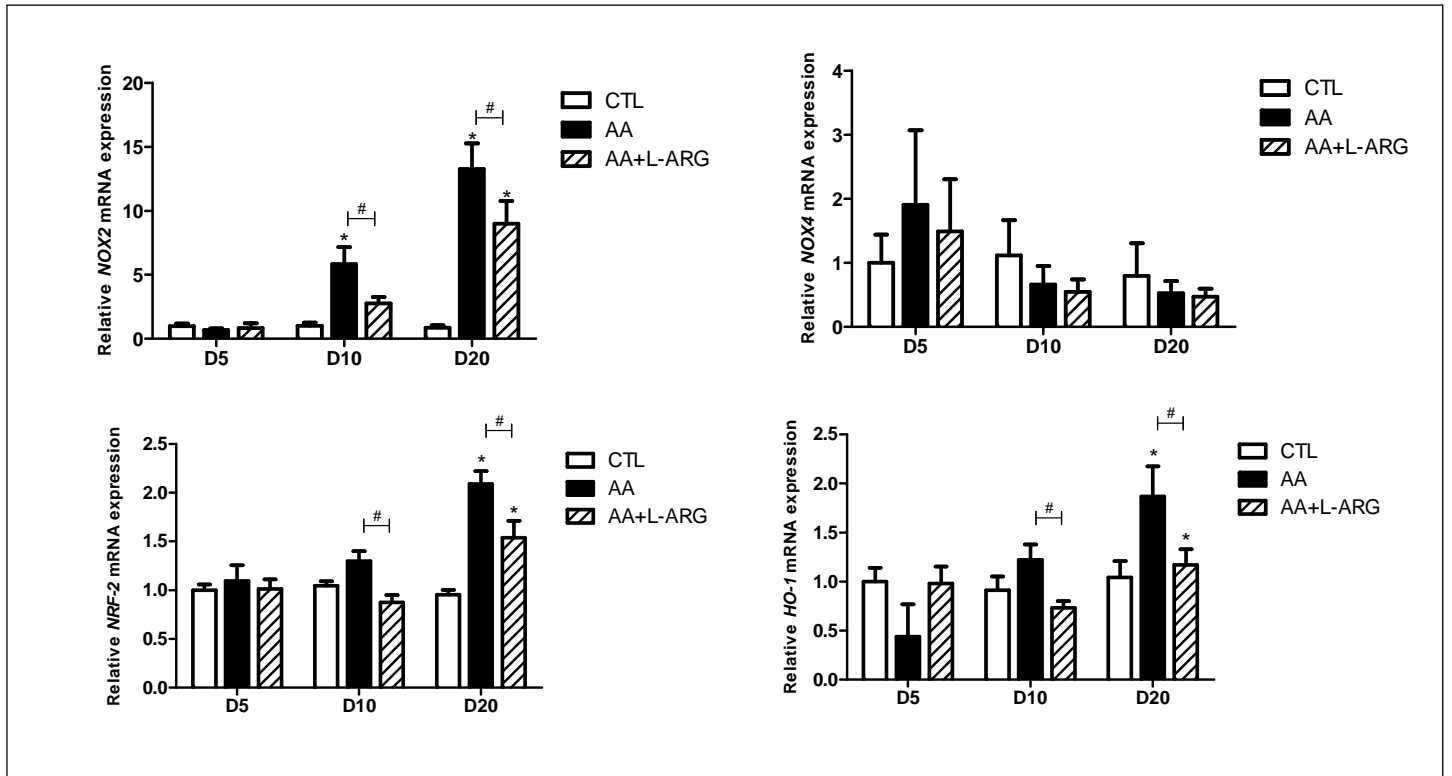

Statistical analysis were performed by two-way ANOVA followed by Holm-Sidak test. \*  $P \leq 0,05$  vs CTL mice, #  $P \leq 0,05$  vs AA mice.
